1  
2  
3  
4  
5  
6  
7  
8  
9  
10  
11  
12  
13  
14  
15  
16  
17  
18  
19  
20  
21  
22  
23  
24  
25  
26

Association between relative income and mental health in adults during the COVID-19  
pandemic in Korea: Insights from a community health survey

Short title: Relative Income and Mental Health during COVID-19

Min Hui Moon<sup>1,2</sup>, Min Hyeok Choi<sup>1,2\*</sup>

<sup>1</sup>Department of Preventive and Occupational & Environmental Medicine, Medical College,  
Pusan National University, Yangsan, Republic of Korea

<sup>2</sup>Office of Public Healthcare Service, Pusan National University Yangsan Hospital, Yangsan,  
Republic of Korea

\*Corresponding author  
E-mail: [come2mh@gmail.com](mailto:come2mh@gmail.com) (MHC)

NOTE: This preprint reports new research that has not been certified by peer review and should not be used to guide clinical practice.

27 Conceptualization: Min Hyeok Choi.  
28 Data curation: Min Hui Moon.  
29 Formal analysis: Min Hui Moon.  
30 Investigation: Min Hui Moon, Min Hyeok Choi.  
31 Methodology: Min Hui Moon, Min Hyeok Choi.  
32 Supervision: Min Hyeok Choi.  
33 Validation: Min Hui Moon, Min Hyeok Choi.  
34 Writing – original draft: Min Hui Moon, Min Hyeok Choi.

35

## 36 **Abstract**

37 People of lower socioeconomic status are much more likely to be vulnerable to  
38 COVID-19. This study aimed to compare the associations between mental health according to  
39 relative national and community income levels during the COVID-19 pandemic. Mental  
40 health inequalities according to income level during the COVID-19 pandemic were assessed  
41 using the Korea Community Health Survey before (2019) and after the COVID-19 pandemic  
42 (2021). Univariate analyses were used to calculate the perceived stress and depression rates  
43 according to the risk factor categories. A multivariate logistic regression analysis was  
44 performed to identify the association between two types of income levels (Korean or  
45 community) and perceived stress and depression. In addition, we investigated the effect of  
46 relative income levels by subgroup (gender and region) on perceived stress and the experience  
47 of depression. During COVID-19, although depression crude rates increased (from 6.24% to  
48 7.2%), perceived stress crude rates remained similar. In addition, as for mental health  
49 inequality according to community income level, even after adjusting for each independent  
50 variable, perceived stress [Odds Ratio (OR): 1.31, 95% Confidence Interval (CI):1.31–1.32]  
51 and experience of depression (OR: 1.63, 95% CI: 1.62–1.63) increased as the income level

52 decreased. The effect of relative income level on perceived stress rate was found to be more  
53 pronounced in urban areas than in rural areas in terms of community income levels.  
54 Contrarily, the effect of relative income level on the depression rate was found to be weaker.  
55 Our findings demonstrated that mental health inequalities based on income level were more  
56 likely to occur during the COVID-19 pandemic and that disparities in community income  
57 levels may better reflect mental health inequalities.

58

## 59 **Introduction**

60 The coronavirus disease (COVID-19) pandemic has significantly impacted mental  
61 health worldwide, including stress, anxiety, and depression worldwide [1,2]. According to a  
62 2021 OECD report (Hewlett, E. et al.), the prevalence of depression in OECD countries has  
63 approximately doubled since the COVID-19 pandemic, with the prevalence being the highest  
64 in Korea at 36.8% among OECD countries [3]. During the COVID-19 pandemic, social  
65 distancing and containment measures had a direct impact on mental health [4-6]. Several  
66 previous studies have reported that large-scale infectious diseases can cause emotional  
67 confusion and difficulties such as depression and anxiety [7-12]. Cao et al. [7] and Shevlin et  
68 al. [11] explored the effects of the COVID-19 pandemic and social isolation on mental health,  
69 and Lee et al. [9] investigated factors related to fear of the COVID-19 infection and its  
70 psychological and social impact. Furthermore, studies have shown that social isolation due to  
71 COVID-19 and fear and awareness of the infection increases symptoms of depression and  
72 anxiety [4].

73 Mental health related to stress and depression is affected by socioeconomic risk  
74 factors such as education level, occupation, and income level. According to Patel et al.'s [13]  
75 study on the effect of income level on mental health inequality among representative  
76 socioeconomic factors, 33 surveys conducted in 20 countries reported that the lower the

77 income level, the higher the risk of depression. Hong et al. [14] found that inequality based on  
78 income level is more pronounced in mental health than in physical health, doubling the size of  
79 inequality over 10 years. Several other studies have consistently shown that people with lower  
80 socioeconomic status are more vulnerable to mental health problems [13-18]. Several studies  
81 have identified mental health inequality according to income level at the national level.  
82 Meanwhile, Song A and Kim W [15] studied income inequality at the national as well as  
83 community levels. As income inequality at the community level has a significant impact on  
84 social capital and access to healthcare infrastructure, measuring health gaps is more useful  
85 than income inequality at the national level [15,16].

86 The COVID-19 pandemic has exacerbated health inequalities among populations with  
87 low socioeconomic status. For example, the lower the education level, income level, or  
88 unstable employment status, the higher the risk of COVID-19 infection, and the higher the  
89 critical severity and mortality rate [19-25]. Hall et al. [19] examined the impact of income  
90 inequality on daily life and mental health during the COVID-19 pandemic. The results  
91 showed that the low-income population had difficulty purchasing food and daily necessities,  
92 and their health status deteriorated because of a lack of time and resources for proper  
93 healthcare. Owing to this influence, the low-income group showed unstable mental health  
94 conditions, such as stress and depression, compared to the high-income group.

95 Previous studies have confirmed that a) mental health issues, such as stress and  
96 depression, deteriorated due to the COVID-19 pandemic, and b) there were differences in  
97 mental health according to income level [13-15]. These studies were often limited to income  
98 inequality at the national level; few studies have analyzed the relationship between income  
99 inequality and mental health at the community level, which can reflect the accessibility of  
100 healthcare infrastructure in the region.

101 This study aimed to identify changes in mental health according to income level

102 before (2019) and after (2021) the COVID-19 pandemic. In addition, it was conducted to  
103 provide a policy basis for improving mental health inequality by comparing the patterns of  
104 health inequality according to income at the national and community levels.

105 Therefore, the purpose of this study was to:

- 106 1) Identify and compare levels of perceived stress and depression according to income  
107 level during the COVID-19 pandemic.
- 108 2) During the COVID-19 pandemic, we analyzed the relationship between perceived  
109 stress and the experience of depression on mental health according to the relative  
110 income levels of the total (Korean income level) and local (community income level)  
111 population.
- 112 3) Investigate the effect of relative income levels by subgroup (gender and region) on  
113 perceived stress and experiences of depression.

114

## 115 **Materials and methods**

### 116 **Data and study population**

117 Data were obtained from the Korea Community Health Survey (KCHS). Since 2008,  
118 the Community Health Survey (CHS) has been conducted annually by the Korea Centers for  
119 Disease Control and Prevention. The CHS is a large-scale survey in which about 220,000  
120 people nationwide participate from August to October every year and includes questions on  
121 chronic disease screening, health behavior, food intake, and socioeconomic status. Survey  
122 data were used as official national indicators such as health level, health behavior, food and  
123 nutrition intake, and chronic disease prevalence in Korea (Korea Community Health Survey  
124 Guidelines, website: <http://chs.kdca.go.kr/>). This survey was conducted in the form of a 1:1  
125 interview with a surveyor visiting households of adults aged 19 or older residing in 255 cities,

126 counties, and districts in Korea. Research participants were selected through probability  
127 proportional sampling and systematic sampling every year. This study selected 449,234  
128 people, excluding those who did not respond, as the final study participants out of 458,341  
129 people who participated in community health surveys in 2019 and 2021.

130

## 131 **Variables**

### 132 **Dependent variables**

133 The dependent variables included perceived stress and depression. Perceived stress  
134 and depression are representative indicators of mental health, and stress plays an important  
135 role in predicting depression [26-28]. Several studies have demonstrated that exposure to  
136 perceived stress and experiences of depression are associated with poor health outcomes and  
137 affect socioeconomic imbalance [29-31]. Low socioeconomic status is associated with a high  
138 prevalence of stress and depression; mental health in low-income groups is particularly  
139 aggravated by persistent poverty and income inequality [32-34]. Perceived stress was assessed  
140 using the question, “How stressful do you feel in your daily life?” with response options of  
141 “feel very much,” “feel a lot,” “feel a little bit,” and “hardly feel it.” For the analysis, those  
142 who responded “I feel it very much” and “I feel it a lot” were classified as those who usually  
143 feel stress in my daily life, and those who answered “I feel it a little” and “I hardly feel it” was  
144 classified as a person who doesn't. The experience of depression was surveyed using the  
145 following question: “Did you feel sadness or despair enough to bother you in your daily life  
146 for more than 2 weeks in the last year?” Their answer was recorded as “yes” or “no.” In this  
147 study, a participant was defined as one who answered “yes.”

148

### 149 **Independent variables**

150 The health inequality variable, considered a major factor in this study, was income

151 level. The income level is an indicator of socioeconomic status that can be used to directly  
152 measure the material resources available to individuals. It is a representative indicator of  
153 socioeconomic inequality and is widely used because it implies that income inequality affects  
154 health outcomes. Income level is closely related to health; the lower the income level, the  
155 higher the rate of unhealthy states [35,36]. The income level used in this study was the  
156 equalized income calculated by dividing household income by the square root of the  
157 household members. The Korean income level reconstructs the average income level of the  
158 entire population into the third quintile, and the community income level is set by dividing it  
159 into third quintiles based on the average income level of 255 cities, counties, and districts.

160 The general factors associated with perceived stress and experience of depression were  
161 included as independent variables after reviewing studies that previously reported mental  
162 health risk factors [37-39]. Demographic variables included gender (men or women), age  
163 group (19–29, 30–64, or  $\geq 65$ ), and area of residence (urban or rural). Social-economic  
164 parameters included education level ( $\leq$ middle school,  $\leq$ high school, or college or above), job  
165 status (economic activity or non-economic activity), marital status (married or not married)  
166 and the basic livelihood condition. Health behavior factors included current smoking (yes or  
167 no), high-risk drinking (men: drinking seven standard drinks or more over once a week,  
168 women: drinking five standard drinks or more over once a week), and walking practice  
169 (walking activity for  $\geq 30$  min,  $\geq$  five days in the previous week).

170

## 171 **Statistical analysis**

172 Perceived stress and depression rates were calculated by performing univariate  
173 analysis according to the dependent variables. Statistically significant differences in perceived  
174 stress and experiences of depression were verified by performing the Rao-Scott chi-square  
175 test. The association between two types of income levels (Korean and community income

176 levels) and mental health (perceived stress and experience of depression) was analyzed by  
177 performing a complex-sample multivariate logistic regression analysis to adjust for other  
178 variables. Subgroup analysis was performed based on two types of income levels (Korean and  
179 community income levels), gender, and area of residence. Statistical significance was set at a  
180 p-value of <0.05. All statistical analyses were performed using SAS 9.4 (SAS Institute, Cary,  
181 NC, USA).

182

### 183 **Ethical considerations**

184 This study was approved by the Institutional Review Board of Pusan National  
185 University Hospital (IRB No. 04-2022-030). All the participants provided written informed  
186 consent for the KCHS. The survey was conducted after sufficiently explaining to the  
187 participants that the results would be used for statistical purposes only and that confidentiality  
188 was guaranteed. The need for informed consent was waived by the IRB because the data were  
189 analyzed anonymously.

190

### 191 **Results**

192 Table 1 shows the general characteristics of the study population. The total number of  
193 participants was 449,234, and the number of weighted analysis participants was 84,491,967  
194 (41,590,294 in 2019 and 42,901,673 in 2021). The proportions of men and women were  
195 similar (49.66% in 2019 and 49.62% in 2021), and those aged 30–64 years were the most  
196 common subgroup population (63.73% in 2019 and 62.75% in 2021). Regarding population  
197 distribution by Korean income levels, Q1 (high) had the highest, followed by Q2 and Q3. The  
198 same was found for community income levels. The perceived stress rates were 24.78% in  
199 2019 and 2021. The experience of depression rates are 6.25% and 7.2% in 2019 and 2021,



200 respectively.

201

202 **Table 1. General characteristics of the study population.**

|                                           |                            | 2019    |            |          | 2021    |            |          |
|-------------------------------------------|----------------------------|---------|------------|----------|---------|------------|----------|
|                                           |                            | N       | Weight N   | Weight % | N       | Weight N   | Weight % |
| <b>Total</b>                              |                            | 223,288 | 41,590,294 | 100.00   | 225,946 | 42,901,673 | 100.00   |
| <b>Gender</b>                             | <b>Men</b>                 | 100,076 | 20,653,435 | 49.66    | 103,022 | 21,287,731 | 49.62    |
|                                           | <b>Women</b>               | 123,212 | 20,936,859 | 50.34    | 122,924 | 21,613,942 | 50.38    |
| <b>Age group</b>                          | <b>19–29</b>               | 22,727  | 7,169,375  | 17.24    | 24,313  | 7,128,368  | 16.62    |
|                                           | <b>30–64</b>               | 127,860 | 26,506,490 | 63.73    | 128,100 | 26,921,724 | 62.75    |
|                                           | <b>≥65</b>                 | 72,701  | 7,914,429  | 19.03    | 73,533  | 8,851,581  | 20.63    |
| <b>Area of residence</b>                  | <b>Urban</b>               | 124,739 | 33,750,880 | 81.15    | 127,315 | 34,870,498 | 81.28    |
|                                           | <b>Rural</b>               | 98,549  | 7,839,414  | 18.85    | 98,631  | 8,031,175  | 18.72    |
| <b>Education</b>                          | <b>Middle school</b>       | 79,077  | 8,303,254  | 19.96    | 72,123  | 7,962,562  | 18.56    |
|                                           | <b>High school</b>         | 63,962  | 12,329,258 | 29.64    | 65,490  | 12,488,195 | 29.11    |
|                                           | <b>College and above</b>   | 80,249  | 20,957,782 | 50.39    | 88,333  | 22,450,916 | 52.33    |
| <b>Job status</b>                         | <b>Economically active</b> | 138,739 | 26,473,047 | 63.65    | 141,544 | 27,324,490 | 63.69    |
|                                           | <b>Non-active</b>          | 84,549  | 15,117,247 | 36.35    | 84,402  | 15,577,183 | 36.31    |
| <b>Marital status</b>                     | <b>Married</b>             | 148,579 | 26,627,752 | 64.02    | 142,120 | 26,190,336 | 61.05    |
|                                           | <b>Not married</b>         | 74,709  | 14,962,542 | 35.98    | 83,826  | 16,711,337 | 38.95    |
| <b>Korea income level<sup>a</sup></b>     | <b>Q1 (high)</b>           | 75,415  | 18,462,860 | 44.39    | 80,798  | 19,667,569 | 45.84    |
|                                           | <b>Q2 (middle)</b>         | 74,948  | 14,451,252 | 34.75    | 70,232  | 13,493,676 | 31.45    |
|                                           | <b>Q3 (low)</b>            | 72,925  | 8,676,182  | 20.86    | 74,916  | 9,740,428  | 22.70    |
| <b>Community income level<sup>a</sup></b> | <b>Q1 (high)</b>           | 76,829  | 15,797,359 | 37.98    | 77,732  | 16,008,586 | 37.31    |
|                                           | <b>Q2 (middle)</b>         | 71,527  | 13,580,193 | 32.65    | 72,386  | 13,889,434 | 32.38    |
|                                           | <b>Q3 (low)</b>            | 74,932  | 12,212,742 | 29.36    | 75,828  | 13,003,653 | 30.31    |
| <b>Basic livelihood condition</b>         | <b>Yes</b>                 | 8,837   | 1,312,334  | 3.16     | 10,692  | 1,694,212  | 3.95     |
|                                           | <b>No</b>                  | 214,451 | 40,277,960 | 96.84    | 215,254 | 41,207,461 | 96.05    |
| <b>Smoking status</b>                     | <b>Yes</b>                 | 186,250 | 33,694,788 | 81.02    | 189,588 | 35,342,643 | 82.38    |
|                                           | <b>No</b>                  | 37,038  | 7,895,506  | 18.98    | 36,358  | 7,559,030  | 17.62    |
| <b>High-risk drinking<sup>b</sup></b>     | <b>Yes</b>                 | 198,249 | 36,136,004 | 86.89    | 205,720 | 38,690,084 | 90.18    |
|                                           | <b>No</b>                  | 25,039  | 5,454,290  | 13.11    | 20,226  | 4,211,589  | 9.82     |
| <b>Physical activity<sup>c</sup></b>      | <b>Yes</b>                 | 89,671  | 18,967,814 | 45.61    | 93,778  | 19,377,491 | 45.17    |
|                                           | <b>No</b>                  | 133,617 | 22,622,480 | 54.39    | 132,168 | 23,524,182 | 54.83    |
| <b>Perceived stress</b>                   | <b>Yes</b>                 | 49,319  | 10,305,831 | 24.78    | 50,169  | 10,630,372 | 24.78    |
|                                           | <b>No</b>                  | 173,969 | 31,284,463 | 75.22    | 175,777 | 32,271,301 | 75.22    |
| <b>Experience of depression</b>           | <b>Yes</b>                 | 13,731  | 2,598,126  | 6.25     | 16,129  | 3,088,224  | 7.20     |
|                                           | <b>No</b>                  | 209,557 | 38,992,168 | 93.75    | 209,817 | 39,813,449 | 92.80    |

203 <sup>a</sup>Categorized using equivalent income; Q1: high-income level; Q2: middle-income level; Q3:

204 low-income level

205 <sup>b</sup>Drinking alcohol: men who drank seven standard drinks or more once a week; women who  
 206 drank five standard drinks or more once a week

207 <sup>c</sup>Walking activity  $\geq 30$  minutes,  $\geq$  five days in the last week.

208

209 Table 2 shows perceived stress and experiences of depression according to the factors  
 210 identified in 2019 and 2021. Perceived stress is significantly higher in women than in men in  
 211 both 2019 and 2021 ( $p < 0.0001$ ). It was most common in the 30–64 subgroup population,  
 212 followed by those aged 19–29 and  $\geq 65$  years. Perceived stress according to the Korean  
 213 income level was significantly higher as the relative income level increased, and the  
 214 community income level was also confirmed by the same result. The number of people living  
 215 in urban areas was higher than in rural areas. Economic activity was significantly higher than  
 216 in the non-economic activity group ( $p < 0.0001$ ). Depression was significantly higher in  
 217 women than in men in both 2019 and 2021 and occurred most commonly in the  $\geq 65$  years age  
 218 group. In 2019 and 2021, the experience of depression rates of lowest Korean income group  
 219 (Q3) is significantly higher. Community income levels showed the same results ( $p < 0.0001$ ).

220

221 **Table 2. Perceived stress and experience of depression according to factors during the**  
 222 **COVID-19 pandemic.**

|           |                             | Perceived stress |       |        |       | Experience of depression |      |        |      |
|-----------|-----------------------------|------------------|-------|--------|-------|--------------------------|------|--------|------|
|           |                             | 2019             |       | 2021   |       | 2019                     |      | 2021   |      |
|           |                             | N                | %     | N      | %     | N                        | %    | N      | %    |
| Gender    | Men                         | 20,789           | 20.77 | 21,384 | 20.76 | 4,350                    | 4.35 | 5,315  | 5.16 |
|           | Women                       | 28,530           | 23.16 | 28,785 | 23.42 | 9,381                    | 7.61 | 10,814 | 8.80 |
|           | <i>p-value</i> <sup>a</sup> | <.0001           |       | <.0001 |       | <.0001                   |      | <.0001 |      |
| Age group | 19–29                       | 6,164            | 27.12 | 6,377  | 26.23 | 1,212                    | 5.33 | 1,479  | 6.08 |
|           | 30–64                       | 31,118           | 24.34 | 32,499 | 25.37 | 7,385                    | 5.78 | 8,845  | 6.90 |
|           | $\geq 65$                   | 12,037           | 16.56 | 11,293 | 15.36 | 5,134                    | 7.06 | 5,805  | 7.89 |
|           | <i>p-value</i>              | <.0001           |       | <.0001 |       | <.0001                   |      | <.0001 |      |

|                                   |                            |        |       |        |       |        |       |        |       |
|-----------------------------------|----------------------------|--------|-------|--------|-------|--------|-------|--------|-------|
| <b>Area of residence</b>          | <b>Urban</b>               | 29,908 | 23.98 | 30,809 | 24.20 | 8,002  | 6.41  | 9,513  | 7.47  |
|                                   | <b>Rural</b>               | 19,411 | 19.70 | 19,360 | 19.63 | 5,729  | 5.81  | 6,616  | 6.71  |
|                                   | <b>p-value</b>             | <.0001 |       | <.0001 |       | <.0001 |       | <.0001 |       |
| <b>Education</b>                  | <b>Middle school</b>       | 14,977 | 18.94 | 12,720 | 17.64 | 6,071  | 7.68  | 6,431  | 8.92  |
|                                   | <b>High school</b>         | 14,005 | 21.90 | 14,807 | 22.61 | 3,859  | 6.03  | 4,613  | 7.04  |
|                                   | <b>College and above</b>   | 20,337 | 25.34 | 22,642 | 25.63 | 3,801  | 4.74  | 5,085  | 5.76  |
|                                   | <b>p-value</b>             | <.0001 |       | <.0001 |       | <.0001 |       | <.0001 |       |
| <b>Job status</b>                 | <b>Economically active</b> | 32,579 | 23.48 | 33,707 | 23.81 | 6,539  | 4.71  | 8,034  | 5.68  |
|                                   | <b>Non-active</b>          | 16,740 | 19.80 | 16,462 | 19.50 | 7,192  | 8.51  | 8,095  | 9.59  |
|                                   | <b>p-value</b>             | <.0001 |       | <.0001 |       | <.0001 |       | <.0001 |       |
| <b>Marital status</b>             | <b>Married</b>             | 31,855 | 21.44 | 30,680 | 21.59 | 7,679  | 5.17  | 8,507  | 5.99  |
|                                   | <b>Not married</b>         | 17,464 | 23.38 | 19,489 | 23.25 | 6,052  | 8.1   | 7,622  | 9.09  |
|                                   | <b>p-value</b>             | <.0001 |       | <.0001 |       | <.0001 |       | <.0001 |       |
| <b>Korean income level</b>        | <b>Q1 (high)</b>           | 17,713 | 23.49 | 19,217 | 23.78 | 3,328  | 4.41  | 4,217  | 5.22  |
|                                   | <b>Q2 (middle)</b>         | 16,244 | 21.67 | 15,456 | 22.01 | 4,071  | 5.43  | 4,381  | 6.24  |
|                                   | <b>Q3 (low)</b>            | 15,362 | 21.07 | 15,496 | 20.68 | 6,332  | 8.68  | 7,531  | 10.05 |
|                                   | <b>p-value</b>             | <.0001 |       | <.0001 |       | <.0001 |       | <.0001 |       |
| <b>Community income level</b>     | <b>Q1 (high)</b>           | 17,237 | 22.44 | 17,670 | 22.73 | 3,313  | 4.31  | 3,964  | 5.10  |
|                                   | <b>Q2 (middle)</b>         | 15,551 | 21.74 | 16,074 | 22.21 | 3,786  | 5.29  | 4,523  | 6.25  |
|                                   | <b>Q3 (low)</b>            | 16,531 | 22.06 | 16,425 | 21.66 | 6,632  | 8.85  | 7,642  | 10.08 |
|                                   | <b>p-value</b>             | <.0001 |       | <.0001 |       | <.0001 |       | <.0001 |       |
| <b>Basic livelihood condition</b> | <b>Yes</b>                 | 2,761  | 31.24 | 3,132  | 29.29 | 1,443  | 16.33 | 1,930  | 18.05 |
|                                   | <b>No</b>                  | 46,558 | 21.71 | 47,037 | 21.85 | 12,288 | 5.73  | 14,199 | 6.60  |
|                                   | <b>p-value</b>             | <.0001 |       | <.0001 |       | <.0001 |       | <.0001 |       |
| <b>Smoking status</b>             | <b>Yes</b>                 | 10,406 | 28.10 | 10,288 | 28.30 | 2,391  | 6.46  | 2,776  | 7.64  |
|                                   | <b>No</b>                  | 38,913 | 20.89 | 39,881 | 21.04 | 11,340 | 6.09  | 13,353 | 7.04  |
|                                   | <b>p-value</b>             | <.0001 |       | <.0001 |       | <.0001 |       | <.0001 |       |
| <b>High-risk drinking</b>         | <b>Yes</b>                 | 6,887  | 27.51 | 5,745  | 28.40 | 1,418  | 5.66  | 1,439  | 7.11  |
|                                   | <b>No</b>                  | 42,432 | 21.40 | 44,424 | 21.59 | 12,313 | 6.21  | 14,690 | 7.14  |
|                                   | <b>p-value</b>             | <.0001 |       | <.0001 |       | <.0001 |       | <.0001 |       |
| <b>Physical activity</b>          | <b>Yes</b>                 | 18,727 | 20.88 | 19,411 | 20.70 | 4,914  | 5.48  | 5,947  | 6.34  |
|                                   | <b>No</b>                  | 30,592 | 22.90 | 30,758 | 23.27 | 8,817  | 6.60  | 10,182 | 7.70  |
|                                   | <b>p-value</b>             | <.0001 |       | <.0001 |       | <.0001 |       | <.0001 |       |

223 <sup>a</sup> Results of the Rao-Scott chi-square test

224

225 Table 3 presents the influence of the two types of income levels (Korean and  
 226 community income levels) on perceived stress and experiences of depression by gender. Both  
 227 Korean and community income levels were significant factors for perceived stress and  
 228 depression after adjusting for the impacts of other factors in both 2019 and 2021. The odds  
 229 ratio (OR) of Korean income level of perceived stress was 1.30 (95% Confidence Interval  
 230 (CI) 1.30–1.30,  $p < 0.0001$ ) and 1.29 (95% CI 1.28–1.29,  $p < 0.0001$ ) in 2019 and 2021,  
 231 respectively. According to the community income level, the perceived stress for the low-  
 232 income level group was 1.26 (95% CI 1.26–1.26) and 1.31 (95% CI 1.31–1.32) in 2019 and  
 233 2021, respectively, compared to the high-income level group. The experience of depression  
 234 was significantly lower in the high-income group than in the low-income group ( $p < 0.0001$ ).  
 235 According to the community income level, perceived stress and experience of depression  
 236 were both high in the low-income group (2019 OR 1.55, 95% CI 1.55–1.56, 2021 OR 1.63,  
 237 95% CI 1.62–1.63). Comparing before and after the COVID-19 pandemic, perceived stress by  
 238 income level decreased and increased at the Korean and community income level,  
 239 respectively. During the COVID-19 pandemic, the magnitude of inequality in the experience  
 240 of depression increased for both types.

241  
 242 **Table 3. Influence of the two types of income levels (Korean or community income**  
 243 **levels) on perceived stress and experience of depression by gender based on complex-**  
 244 **sample multivariate logistic regression analysis.**

|                                   |           | Perceived stress                              |                     |                                               |                     | Experience of depression                      |                     |                                               |                     |
|-----------------------------------|-----------|-----------------------------------------------|---------------------|-----------------------------------------------|---------------------|-----------------------------------------------|---------------------|-----------------------------------------------|---------------------|
|                                   |           | 2019                                          |                     | 2021                                          |                     | 2019                                          |                     | 2021                                          |                     |
|                                   |           | Adj OR <sup>a</sup><br>(95% CI <sup>b</sup> ) | <i>p</i> -<br>value | Adj OR <sup>a</sup><br>(95% CI <sup>b</sup> ) | <i>p</i> -<br>value | Adj OR <sup>a</sup><br>(95% CI <sup>b</sup> ) | <i>p</i> -<br>value | Adj OR <sup>a</sup><br>(95% CI <sup>b</sup> ) | <i>p</i> -<br>value |
| <b>Total</b>                      |           |                                               |                     |                                               |                     |                                               |                     |                                               |                     |
| <b>Korean<br/>income level</b>    | <b>Q1</b> | Reference                                     |                     | Reference                                     |                     | Reference                                     |                     | Reference                                     |                     |
|                                   | <b>Q2</b> | 1.09<br>(1.09-1.09)                           | <.0001              | 1.10<br>(1.10-1.11)                           | <.0001              | 1.21<br>(1.21-1.22)                           | <.0001              | 1.17<br>(1.17-1.18)                           | <.0001              |
|                                   | <b>Q3</b> | 1.30<br>(1.30-1.30)                           | <.0001              | 1.29<br>(1.28-1.29)                           | <.0001              | 1.72<br>(1.71-1.72)                           | <.0001              | 1.73<br>(1.72-1.73)                           | <.0001              |
| <b>Community<br/>income level</b> | <b>Q1</b> | Reference                                     |                     | Reference                                     |                     | Reference                                     |                     | Reference                                     |                     |
|                                   | <b>Q2</b> | 1.07                                          | <.0001              | 1.11                                          | <.0001              | 1.12                                          | <.0001              | 1.11                                          | <.0001              |

|                               |           |                     |        |                     |        |                     |        |                     |        |
|-------------------------------|-----------|---------------------|--------|---------------------|--------|---------------------|--------|---------------------|--------|
|                               |           | (1.07-1.07)         |        | (1.11-1.11)         |        | (1.11-1.12)         |        | (1.11-1.12)         |        |
|                               | <b>Q3</b> | 1.26<br>(1.26-1.26) | <.0001 | 1.31<br>(1.31-1.32) | <.0001 | 1.55<br>(1.55-1.56) | <.0001 | 1.63<br>(1.62-1.63) | <.0001 |
| <b>Men</b>                    |           |                     |        |                     |        |                     |        |                     |        |
|                               | <b>Q1</b> | Reference           |        | Reference           |        | Reference           |        | Reference           |        |
| <b>Korean income level</b>    | <b>Q2</b> | 1.04<br>(1.04-1.04) | <.0001 | 1.08<br>(1.08-1.09) | <.0001 | 1.15<br>(1.14-1.15) | <.0001 | 1.13<br>(1.12-1.14) | <.0001 |
|                               | <b>Q3</b> | 1.21<br>(1.20-1.21) | <.0001 | 1.24<br>(1.23-1.24) | <.0001 | 1.64<br>(1.63-1.65) | <.0001 | 1.75<br>(1.74-1.76) | <.0001 |
|                               | <b>Q1</b> | Reference           |        | Reference           |        | Reference           |        | Reference           |        |
| <b>Community income level</b> | <b>Q2</b> | 1.05<br>(1.04-1.05) | <.0001 | 1.08<br>(1.08-1.08) | <.0001 | 1.12<br>(1.11-1.13) | <.0001 | 1.08<br>(1.08-1.09) | <.0001 |
|                               | <b>Q3</b> | 1.20<br>(1.20-1.20) | <.0001 | 1.27<br>(1.26-1.27) | <.0001 | 1.48<br>(1.47-1.49) | <.0001 | 1.65<br>(1.64-1.66) | <.0001 |
|                               | <b>Q1</b> | Reference           |        | Reference           |        | Reference           |        | Reference           |        |
| <b>Women</b>                  |           |                     |        |                     |        |                     |        |                     |        |
|                               | <b>Q1</b> | Reference           |        | Reference           |        | Reference           |        | Reference           |        |
| <b>Korean income level</b>    | <b>Q2</b> | 1.15<br>(1.14-1.15) | <.0001 | 1.13<br>(1.12-1.13) | <.0001 | 1.24<br>(1.24-1.25) | <.0001 | 1.19<br>(1.18-1.19) | <.0001 |
|                               | <b>Q3</b> | 1.39<br>(1.38-1.39) | <.0001 | 1.33<br>(1.32-1.33) | <.0001 | 1.71<br>(1.70-1.72) | <.0001 | 1.67<br>(1.66-1.68) | <.0001 |
|                               | <b>Q1</b> | Reference           |        | Reference           |        | Reference           |        | Reference           |        |
| <b>Community income level</b> | <b>Q2</b> | 1.10<br>(1.10-1.10) | <.0001 | 1.14<br>(1.14-1.14) | <.0001 | 1.11<br>(1.11-1.12) | <.0001 | 1.13<br>(1.13-1.13) | <.0001 |
|                               | <b>Q3</b> | 1.32<br>(1.31-1.32) | <.0001 | 1.35<br>(1.35-1.36) | <.0001 | 1.56<br>(1.55-1.57) | <.0001 | 1.59<br>(1.58-1.59) | <.0001 |

245 <sup>a</sup>Adj OR, adjusted odds ratio; <sup>b</sup>CI, confidence interval; adjusted for gender, age, education,  
 246 job status, marital status, basic livelihood condition, smoking status, high-risk drinking, and  
 247 physical activity.

248

249 Table 4 shows the results of the subgroup analysis that investigated the income level  
 250 between the stress perception and experience of depression rates by gender and area of  
 251 residence. Excluding the Korean income of men living in rural areas in 2021, the magnitude  
 252 of inequality in stress perception was statistically significant ( $p < 0.0001$ ). The size of the  
 253 inequality in experiences of depression was statistically significant in both 2019 and 2021,  
 254 except for men living in rural areas with a Korean income level ( $p < 0.0001$ ). In both 2019 and  
 255 2021, the stress perception rate based on Korean income level showed greater inequality in  
 256 urban areas. Furthermore, community income levels showed greater inequality in urban and  
 257 rural areas in 2019 and 2021, respectively. The magnitude of inequality in perceived stress by  
 258 gender was higher for women in both 2019 and 2021. In addition, the magnitude of inequality  
 259 in the depression recognition was larger for women than for men; however, in 2021, only the

260 magnitude of inequality for men living in rural areas was higher than that for women.

261

262 **Table 4. Influence of the two types of income level (Korean or community income level)**

263 **on perceived stress and experience of depression by gender and region of residence**

264 **based on complex-sample multivariate logistic regression analysis.**

|              |                        |    | Perceived stress                              |         |                                               |         | Experience of depression                      |         |                                               |         |
|--------------|------------------------|----|-----------------------------------------------|---------|-----------------------------------------------|---------|-----------------------------------------------|---------|-----------------------------------------------|---------|
|              |                        |    | 2019                                          |         | 2021                                          |         | 2019                                          |         | 2021                                          |         |
|              |                        |    | Adj OR <sup>a</sup><br>(95% CI <sup>b</sup> ) | p-value | Adj OR <sup>a</sup><br>(95% CI <sup>b</sup> ) | p-value | Adj OR <sup>a</sup><br>(95% CI <sup>b</sup> ) | p-value | Adj OR <sup>a</sup><br>(95% CI <sup>b</sup> ) | p-value |
| <b>Total</b> |                        |    |                                               |         |                                               |         |                                               |         |                                               |         |
| Urban        | Korean income level    | Q1 | Reference                                     |         | Reference                                     |         | Reference                                     |         | Reference                                     |         |
|              |                        | Q2 | 1.07<br>(1.07-1.07)                           | <.0001  | 1.12<br>(1.11-1.12)                           | <.0001  | 1.10<br>(1.10-1.11)                           | <.0001  | 1.10<br>(1.10-1.10)                           | <.0001  |
|              |                        | Q3 | 1.26<br>(1.26-1.26)                           | <.0001  | 1.31<br>(1.30-1.31)                           | <.0001  | 1.53<br>(1.53-1.54)                           | <.0001  | 1.63<br>(1.62-1.64)                           | <.0001  |
|              | Community income level | Q1 | Reference                                     |         | Reference                                     |         | Reference                                     |         | Reference                                     |         |
|              |                        | Q2 | 1.11<br>(1.11-1.11)                           | <.0001  | 1.12<br>(1.12-1.13)                           | <.0001  | 1.23<br>(1.22-1.23)                           | <.0001  | 1.17<br>(1.17-1.17)                           | <.0001  |
|              |                        | Q3 | 1.33<br>(1.33-1.33)                           | <.0001  | 1.30<br>(1.30-1.30)                           | <.0001  | 1.76<br>(1.75-1.76)                           | <.0001  | 1.73<br>(1.73-1.74)                           | <.0001  |
| Rural        | Korean income level    | Q1 | Reference                                     |         | Reference                                     |         | Reference                                     |         | Reference                                     |         |
|              |                        | Q2 | 1.08<br>(1.07-1.08)                           | <.0001  | 1.07<br>(1.07-1.08)                           | <.0001  | 1.19<br>(1.18-1.20)                           | <.0001  | 1.18<br>(1.17-1.19)                           | <.0001  |
|              |                        | Q3 | 1.25<br>(1.24-1.26)                           | <.0001  | 1.34<br>(1.33-1.35)                           | <.0001  | 1.62<br>(1.61-1.63)                           | <.0001  | 1.62<br>(1.61-1.64)                           | <.0001  |
|              | Community income level | Q1 | Reference                                     |         | Reference                                     |         | Reference                                     |         | Reference                                     |         |
|              |                        | Q2 | 0.98<br>(0.98-0.99)                           | <.0001  | 1.01<br>(1.00-1.01)                           | 0.0004  | 1.11<br>(1.10-1.12)                           | <.0001  | 1.17<br>(1.16-1.18)                           | <.0001  |
|              |                        | Q3 | 1.15<br>(1.15-1.16)                           | <.0001  | 1.21<br>(1.20-1.21)                           | <.0001  | 1.51<br>(1.50-1.53)                           | <.0001  | 1.71<br>(1.69-1.72)                           | <.0001  |
| <b>Men</b>   |                        |    |                                               |         |                                               |         |                                               |         |                                               |         |
| Urban        | Korean income level    | Q1 | Reference                                     |         | Reference                                     |         | Reference                                     |         | Reference                                     |         |
|              |                        | Q2 | 1.04<br>(1.04-1.04)                           | <.0001  | 1.09<br>(1.08-1.09)                           | <.0001  | 1.12<br>(1.11-1.13)                           | <.0001  | 1.07<br>(1.07-1.08)                           | <.0001  |
|              |                        | Q3 | 1.21<br>(1.21-1.22)                           | <.0001  | 1.26<br>(1.25-1.26)                           | <.0001  | 1.48<br>(1.47-1.48)                           | <.0001  | 1.67<br>(1.66-1.68)                           | <.0001  |
|              | Community income level | Q1 | Reference                                     |         | Reference                                     |         | Reference                                     |         | Reference                                     |         |
|              |                        | Q2 | 1.06<br>(1.06-1.06)                           | <.0001  | 1.10<br>(1.10-1.10)                           | <.0001  | 1.18<br>(1.17-1.18)                           | <.0001  | 1.16<br>(1.15-1.16)                           | <.0001  |
|              |                        | Q3 | 1.24<br>(1.23-1.24)                           | <.0001  | 1.25<br>(1.25-1.26)                           | <.0001  | 1.71<br>(1.70-1.73)                           | <.0001  | 1.72<br>(1.71-1.73)                           | <.0001  |
| Rural        | Korean income level    | Q1 | Reference                                     |         | Reference                                     |         | Reference                                     |         | Reference                                     |         |
|              |                        | Q2 | 1.07<br>(1.06-1.07)                           | <.0001  | 1.05<br>(1.04-1.06)                           | <.0001  | 1.13<br>(1.11-1.14)                           | <.0001  | 1.12<br>(1.11-1.14)                           | <.0001  |
|              |                        | Q3 | 1.14<br>(1.13-1.15)                           | <.0001  | 1.32<br>(1.31-1.33)                           | <.0001  | 1.48<br>(1.46-1.50)                           | <.0001  | 1.57<br>(1.55-1.59)                           | <.0001  |
|              | Community income level | Q1 | Reference                                     |         | Reference                                     |         | Reference                                     |         | Reference                                     |         |
|              |                        | Q2 | 0.94<br>(0.93-0.94)                           | <.0001  | 1.00<br>(0.99-1.00)                           | 0.6250  | 1.00<br>(0.98-1.01)                           | 0.4675  | 1.01<br>(0.99-1.02)                           | 0.3533  |
|              |                        | Q3 | 1.07<br>(1.06-1.08)                           | <.0001  | 1.16<br>(1.16-1.17)                           | <.0001  | 1.35<br>(1.33-1.37)                           | <.0001  | 1.80<br>(1.78-1.82)                           | <.0001  |
| <b>Women</b> |                        |    |                                               |         |                                               |         |                                               |         |                                               |         |
| Urban        | Korean income level    | Q1 | Reference                                     |         | Reference                                     |         | Reference                                     |         | Reference                                     |         |
|              |                        | Q2 | 1.10<br>(1.10-1.10)                           | <.0001  | 1.15<br>(1.14-1.15)                           | <.0001  | 1.09<br>(1.09-1.10)                           | <.0001  | 1.11<br>(1.11-1.12)                           | <.0001  |
|              |                        | Q3 | 1.31<br>(1.31-1.31)                           | <.0001  | 1.35<br>(1.34-1.35)                           | <.0001  | 1.54<br>(1.53-1.54)                           | <.0001  | 1.58<br>(1.57-1.59)                           | <.0001  |
|              | Community income level | Q1 | Reference                                     |         | Reference                                     |         | Reference                                     |         | Reference                                     |         |
|              |                        | Q2 | 1.17<br>(1.16-1.17)                           | <.0001  | 1.15<br>(1.14-1.15)                           | <.0001  | 1.25<br>(1.25-1.26)                           | <.0001  | 1.17<br>(1.17-1.18)                           | <.0001  |

|                                   |           |                     |        |                     |        |                     |        |                     |        |
|-----------------------------------|-----------|---------------------|--------|---------------------|--------|---------------------|--------|---------------------|--------|
|                                   | <b>Q3</b> | 1.41<br>(1.41-1.42) | <.0001 | 1.33<br>(1.33-1.34) | <.0001 | 1.73<br>(1.72-1.74) | <.0001 | 1.69<br>(1.68-1.70) | <.0001 |
|                                   | <b>Q1</b> | Reference           |        | Reference           |        | Reference           |        | Reference           |        |
| <b>Korean<br/>income level</b>    | <b>Q2</b> | 1.10<br>(1.09-1.11) | <.0001 | 1.10<br>(1.10-1.11) | <.0001 | 1.22<br>(1.21-1.23) | <.0001 | 1.21<br>(1.20-1.23) | <.0001 |
|                                   | <b>Q3</b> | 1.34<br>(1.33-1.35) | <.0001 | 1.38<br>(1.37-1.38) | <.0001 | 1.68<br>(1.66-1.69) | <.0001 | 1.65<br>(1.63-1.66) | <.0001 |
| <b>Rural</b>                      | <b>Q1</b> | Reference           |        | Reference           |        | Reference           |        | Reference           |        |
|                                   | <b>Q2</b> | 1.04<br>(1.03-1.05) | <.0001 | 1.03<br>(1.03-1.04) | <.0001 | 1.19<br>(1.17-1.20) | <.0001 | 1.28<br>(1.27-1.30) | <.0001 |
| <b>Community<br/>income level</b> | <b>Q3</b> | 1.23<br>(1.22-1.24) | <.0001 | 1.27<br>(1.26-1.28) | <.0001 | 1.59<br>(1.57-1.60) | <.0001 | 1.65<br>(1.63-1.67) | <.0001 |

265 <sup>a</sup>Adj OR, adjusted odds ratio; <sup>b</sup>CI, confidence interval; adjusted for gender, age, education,  
 266 job status, marital status, basic livelihood condition, smoking status, high-risk drinking, and  
 267 physical activity.

268

## 269 Discussion

270 This is the first study in Korea to compare mental health inequality according to  
 271 relative income at the national and community levels using the CHS during the COVID-19  
 272 period. This study intended to provide basic data necessary for policy development to resolve  
 273 mental health inequality caused by income gaps in the event of large-scale infectious diseases.

274 During the COVID-19 pandemic, although depression crude rates increased, perceived  
 275 stress crude rates remained similar. In addition, regarding mental health inequality according  
 276 to income level, even after adjusting for each independent variable, perceived stress and the  
 277 experience of depression increased as income level decreased. Hall et al. [19] found that low-  
 278 income groups had less access to resources for responding to COVID-19 and suffered more  
 279 economic stress than high-income groups. These economic difficulties reportedly have a  
 280 negative impact on daily life and mental health [19,40,41]. As a result of measuring perceived  
 281 stress as income inequality at the national level, it decreased after the COVID-19 outbreak,  
 282 while income inequality at the community level increased after the outbreak of COVID-19.  
 283 When measuring inequality by income level, few previous studies have identified mental  
 284 health inequality at the community income level. Moreover, in some cases, inequality due to

285 the income gap at the community level may be more affected than the income gap at the  
286 national level. Aneshensel CS and Sucoff CA [42] and Mair C et al. [43] found that the  
287 economic situation (income level), population composition, and characteristics of the  
288 residential environment in the area of residence have an effect on depression symptoms. This  
289 result is consistent with previous studies that used the relative income gap at the community  
290 level as a measure of health inequality and as a significant indicator for identifying the  
291 relationship between income and depressive symptoms [15,16].

292 In this study, perceived stress was more vulnerable in the low-income group compared  
293 to the high-income group for both income levels. Experience of depression showed the same  
294 results, While women and men in 2019 and 2021, respectively, were susceptible to  
295 experiencing depression. The result of women mental health inequality observed in this study  
296 was higher than that of men, consistent with the results observed by Almeida et al. [44].  
297 However, after the COVID-19 pandemic, the findings that men experienced higher levels of  
298 depression than women were contradictory.

299 Additionally, this study confirmed the regional characteristics (urban and rural areas)  
300 related to changes in mental health inequality according to relative income levels during the  
301 COVID-19 pandemic. The effect of relative income level on perceived stress rate was found  
302 to be more pronounced in urban areas than in rural areas. On the contrary, the effect of  
303 relative income level on the depression rate was found to be weaker and more vulnerable in  
304 urban and rural areas, in terms of Korean and community income levels, respectively. This  
305 lack of consistent results has been reported in previous studies, as the impact on mental health  
306 inequality in urban and rural areas is conflicting [45-49]. In urban areas, social distancing is  
307 strongly practiced because of the high number of infected people, which may increase mental  
308 health inequality. Furthermore, mental health may be more vulnerable in rural areas because  
309 of the lack of information, access, and social support. These results indicate that the relative



310 income level during the COVID-19 pandemic can be expected to have different effects on  
311 mental health depending on regional characteristics; however, additional research needs to be  
312 conducted in the future.

313         The limitations of this study are as follows. First, the perceived stress and experience  
314 of depression used as outcome variables are values that record responses in the form of self-  
315 report rather than medical diagnosis, which raises the possibility of bias. However, because  
316 items most frequently used in national surveys were used, the possibility of comparison with  
317 other studies related to this topic is high. Second, changes in direct mental health inequalities  
318 across the subperiods of the COVID-19 pandemic were not identified. In Korea, the COVID-  
319 19 pandemic has usually been divided into three periods: the initial epidemic, delta mutation,  
320 and omicron epidemic phase. It is necessary to identify the difference in mental health  
321 inequality according to the income gap within the detailed epidemic period because the  
322 response strategies differ depending on the size of the epidemic and the impact of restrictions  
323 on socioeconomic activities, such as social distancing. In addition, future studies will need to  
324 address how inequality will change even after the end of COVID-19.

325

## 326 **Conclusions**

327         This study identified aspects of mental health inequality according to relative income  
328 during the COVID-19 pandemic and changes in inequality according to two types of income  
329 levels. This study indicated inequality in mental health according to income level and  
330 differences based on gender and residential area. To alleviate mental health inequality,  
331 income inequality should be improved, and mental health policies should be intensively  
332 implemented, especially for socioeconomically unequal population groups.

333

## 334 **Acknowledgments**

335 This study was supported by a 2022 research grant from Pusan National University  
336 Yangsan Hospital.

337

## 338 **References**

339 1. Gibson B, Schneider B, Talamonti J, Forshaw M. Impact of inequality on mental health  
340 outcomes during the COVID-19 pandemic: A systematic review. *Can Psychol.*  
341 2021;62(1):101–26. doi: 10.1037/cap0000272.

342 2. Hoyt LT, Cohen AK, Dull B, Castro EM, Yazdani N. “Constant stress has become the new  
343 normal”: Stress and anxiety inequalities among US college students in the time of COVID-  
344 19. *J Adolesc Health.* 2021;68(2):270–6. doi: 10.1016/j.jadohealth.2020.10.030 PMID:  
345 33288459.

346 3. Hewlett E, Takino S, Nishina Y, Prinz, and C. Tackling the mental health impact of the  
347 COVID-19 crisis: An integrated whole-of-society response. Organization for Economic  
348 Cooperation and Development (OECD). 2021.

349 4. Oral T, Gunlu A. Adaptation of the social distancing scale in the covid-19 era: its  
350 association with depression, anxiety, stress, and resilience in Turkey. *Int J Ment Health*  
351 *Addict.* 2021;20(3):1336-53. doi: 10.1007/s11469-020-00447-1 PMID: 33688310.

352 5. Benke C, Autenrieth LK, Asselmann E, Pané-Farré CA. Lockdown, quarantine measures,  
353 and social distancing: Associations with depression, anxiety and distress at the beginning  
354 of the COVID-19 pandemic among adults from Germany. *Psychiatry Res.* 2020;293. doi:  
355 10.1016/j.psychres.2020.113462 PMID: 32987222.

356 6. Venkatesh A, Edirappuli S. Social distancing in covid-19: what are the mental health  
357 implications?. *Bmj.* 2020;369. doi: 10.1136/bmj.m1379.

358 7. Cao W, Fang Z, Hou G, Han M, Xu X, Dong J, Zheng J. Psychological impact of the  
359 COVID-19 pandemic on college students in China. *Psychiatry Res.* 2020;287:112934. doi:

- 360 10.1016/j.psychres.2020.112934 PMID: 32229390.
- 361 8. Jean-Baptiste CO, Herring RP, Beeson WL, Dos Santos H, Banta JE. Stressful life events  
362 and social capital during the early phase of COVID-19 in the US. *Soc Sci Humanit Open*.  
363 2020;2(1):100057. doi: 10.1016/j.ssaho.2020.100057 PMID: 34173495.
- 364 9. Lee D, Kim Y, Lee D, Hwang H, Nam S, Kim J. Inflammation and symptoms of  
365 coronavirus (COVID-19) infection in the general public, the darkening of the social  
366 environment and its effects on weapons. *Korean Journal of Psychology*. 2020;32(4):2119–  
367 56.
- 368 10. Lee J, Kim J, Kim M. The effect of social distancing on depression: The mediating effect  
369 of loneliness and the moderating effect of neurotic tendencies. *Humanities and Social  
370 Sciences*. 2021;12(3):1239–53.
- 371 11. Shevlin M, McBride O, Murphy J, Miller JG, Hartman TK, Levita L, et al. Anxiety,  
372 depression, traumatic stress and COVID-19-related anxiety in the UK general population  
373 during the COVID-19 pandemic. *BJPsych Open*. 2020;6(6):e125. doi:  
374 10.1192/bjo.2020.109 PMID: 33070797.
- 375 12. Tull MT, Edmonds KA, Scamaldo K, Richmond KM, Rose JR, Gratz JP. Psychological  
376 outcomes associated with stay-at-home orders and the perceived impact of COVID-19 on  
377 daily life. *Psychiatry Res*. 2020;289:113098. doi: 10.1016/j.psychres.2020.113098 PMID:  
378 32434092.
- 379 13. Patel V, Burns JK, Dhingra M, Tarver L, Kohrt BA, Lund C. Income inequality and  
380 depression: A systematic review and meta-analysis of the association and a scoping review  
381 of mechanisms. *World Psychiatry*. 2018;17(1):76–89. doi: 10.1002/wps.20492 PMID:  
382 29352539.
- 383 14. Hong J, Knapp M, McGuire A. Income-related inequalities in the prevalence of  
384 depression and suicidal behavior: A 10-year trend following an economic crisis. *World*

- 385       Psychiatry. 2011;10(1):40–4. doi: 10.1002/j.2051-5545.2011.tb00012.x PMID: 21379355.
- 386   15. Song A, Kim W. Association between relative income and depressive symptoms in adults:  
387       Findings from a nationwide survey in Korea. *J Affect Disord.* 2020;263:236–40. doi:  
388       10.1016/j.jad.2019.11.149 PMID: 31818782
- 389   16. Tumin D, Menegay M, Shrider EA, Nau M, Tumin R. Local income inequality, individual  
390       socioeconomic status, and unmet healthcare needs in Ohio, USA. *Health Equity.*  
391       2018;2(1):37–44. doi: 10.1089/hec.2017.0058 PMID: 30283849.
- 392   17. Santiago CD, Wadsworth ME, Stump J. Socioeconomic status, neighborhood  
393       disadvantage, and poverty-related stress: Prospective effects on psychological syndromes  
394       among diverse low-income families. *J Econ Psychol.* 2011;32(2):218-230. doi:  
395       10.1016/j.joep.2009.10.008.
- 396   18. Zimmerman FJ, Katon W. Socioeconomic status, depression disparities, and financial  
397       strain: What lies behind the income-depression relationship? *Health Econ.*  
398       2005;4(12):1197–215. doi: 10.1002/hec.1011 PMID: 15945040.
- 399   19. Hall LR, Sanchez K, da Graca B, Bennett MM, Powers M, Warren AM. Income  
400       differences and COVID-19: Impact on daily life and mental health. *Popul Health Manag.*  
401       2022;25(3):384–91. doi.org/10.1089/pop.2021.0214 PMID: 34652228.
- 402   20. McGowan VJ, Bambra C. COVID-19 mortality and deprivation: pandemic, syndemic, and  
403       endemic health inequalities. *Lancet Public Health.* 2022;7(11):e966–75. doi:  
404       10.1016/S2468-2667(22)00223-7 PMID: 36334610.
- 405   21. Saarinen S, Moustgaard H, Remes H, Sallinen R, Martikainen P. Income differences in  
406       COVID-19 incidence and severity in Finland among people with foreign and native  
407       background: A population-based cohort study of individuals nested within households.  
408       *PLoS Med.* 2022;19(8):e1004038. doi: 10.1371/journal.pmed.1004038 PMID: 35947575.
- 409   22. Green H, Fernandez R, MacPhail C. The social determinants of health and health

- 410 outcomes among adults during the COVID-19 pandemic: A systematic review. *Public*  
411 *Health Nurs.* 2021;38(6):942–52. doi: 10.1111/phn.12959 PMID: 34403525.
- 412 23. Khanijahani A, Iezadi S, Gholipour K, Azami-Aghdash S, Naghibi DA. A systematic  
413 review of racial/ethnic and socioeconomic disparities in COVID-19. *Int J Equity Health.*  
414 2021;20(1):248. doi: 10.1186/s12939-021-01582-4 PMID: 34819081.
- 415 24. De Lusignan S, Joy M, Oke J, McGagh D, Nicholson B, Sheppard J, et al. Disparities in  
416 the excess risk of mortality in the first wave of COVID-19: Cross sectional study of the  
417 English sentinel network. *J Infect.* 2020;81(5):785–92. doi: 10.1016/j.jinf.2020.08.037  
418 PMID: 32858068.
- 419 25. Shah GH, Shankar P, Schwind JS, Sittaramane V. The detrimental impact of the COVID-  
420 19 crisis on health equity and social determinants of health. *J Public Health Manag Pract.*  
421 2020;26(4):317–19. doi: 10.1097/PHH.0000000000001200 PMID: 32433385.
- 422 26. Hammen C. Generation of stress in the course of unipolar depression. *J Abnorm Psychol.*  
423 1991;100(4):555. doi: 10.1037//0021-843x.100.4.555 PMID: 1757669.
- 424 27. Fredrickson BL, Joiner T. Positive emotions trigger upward spirals toward emotional  
425 well-being. *Psychological science.* 2002;13(2):172–5. doi: 10.1111/1467-9280.00431  
426 PMID: 11934003.
- 427 28. Sariusz-Skapska M, Czabała JC, Dudek D, Zieba A. Assessment of stressful life events  
428 and sense of coherence in patients with unipolar and bipolar disorder. *Psychiatria Polska.*  
429 2003;37(5):836–75. PMID: 14631607.
- 430 29. Ngui EM, Khasakhala L, Ndetei D, Roberts LW. Mental disorders, health inequalities and  
431 ethics: A global perspective. *Int Rev Psychiatry.* 2010;22(3):235–44. doi:  
432 10.3109/09540261.2010.485273 PMID: 20528652.
- 433 30. Thoits PA. Stress and health: Major findings and policy implications. *J Health Soc Behav.*  
434 2010;51(S):S41–53. doi: 10.1177/0022146510383499 PMID: 20943582.

- 435 31. Lantz PM, House JS, Mero RP, Williams DR. Stress, life events, and socioeconomic  
436 disparities in health: Results from the Americans' Changing Lives Study. *J Health Soc*  
437 *Behav.* 2005;46(3):274–88. doi: 10.1177/002214650504600305 PMID: 16259149.
- 438 32. Freeman A, Tyrovolas S, Koyanagi A, Chatterji S, Leonardi M, Ayuso-Mateos JL, et al.  
439 The role of socio-economic status in depression: Results from the COURAGE (aging  
440 survey in Europe). *BMC Public Health.* 2016;16:1–8. doi: 10.1186/s12889-016-3638-0  
441 PMID: 27760538.
- 442 33. Kim J, Shim J, Lee R. Material hardship and depression among low-income households in  
443 South Korea: Differences by household type. *Int J Soc Welf.* 2016;25(2):187–98. doi:  
444 10.1111/ijsw.12181.
- 445 34. Lorant V, Croux C, Weich S, Deliège D, Mackenbach J, Anseau M. Depression and  
446 socio-economic risk factors: 7-year longitudinal population study. *Br J Psychiatry.*  
447 2007;190(4):293–8. doi: 10.1192/bjp.bp.105.020040 PMID: 17401034.
- 448 35. Kim D, Lee S, Ki M, Kim M, Kim S, Kim Y, Lee J. Developing Health Inequalities  
449 Indicators and Monitoring the Status of Health Inequalities in Korea. Korea Institute for  
450 Health and Social Affairs. 2013.
- 451 36. Ichiro Kawachi, M. D. *Social epidemiology.* Oxford University Press; c2014.
- 452 37. Williams DR, Yu Y, Jackson JS, Anderson NB. Racial differences in physical and mental  
453 health: Socio-economic status, stress and discrimination. *J Health Psychol.* 1997;2(3):335–  
454 51. doi: 10.1177/135910539700200305 PMID: 22013026.
- 455 38. Newmann JP, Engel RJ, Jensen JE. Age differences in depressive symptom experiences. *J*  
456 *Gerontol.* 1991;46(5):224–35. doi: 10.1093/geronj/46.5.P224 PMID: 1890289.
- 457 39. Potts MK, Burnam MA, Wells KB. Gender differences in depression detection: A  
458 comparison of clinician diagnosis and standardized assessment. *Psychol Assess.*  
459 1991;3(4):609. doi: 10.1037/1040-3590.3.4.609.

- 460 40. Ettman CK, Abdalla SM, Cohen GH, Sampson L, Vivier PM, Galea S. Prevalence of  
461 depression symptoms in US adults before and during the COVID-19 pandemic. *JAMA*  
462 *Netw Open*. 2020;3(9):e2019686. doi: 10.1001/jamanetworkopen.2020.19686 PMID:  
463 32876685.
- 464 41. Swaziek Z, Wozniak A. Disparities old and new in US mental health during the  
465 COVID-19 pandemic. *Fisc Stud*. 2020;41(3):709–32. doi: 10.1111/1475-5890.12244  
466 PMID: 33362315.
- 467 42. Aneshensel CS, Sucoff CA. The neighborhood context of adolescent mental health. *J*  
468 *Health Soc Behav*. 1996;37:293–310. doi: 10.2307/2137258 PMID: 8997886.
- 469 43. Mair C, Roux AD, Galea S. Are neighborhood characteristics associated with depressive  
470 symptoms? A review of evidence. *J Epidemiol Community Health*. 2008;62(11):940–6.  
471 doi: 10.1136/jech.2007.066605 PMID: 18775943.
- 472 44. Almeida M, Shrestha AD, Stojanac D, Miller LJ. The impact of the COVID-19 pandemic  
473 on women’s mental health. *Arch Womens Ment Health*. 2020;23:741–8. doi:  
474 10.1007/s00737-020-01092-2 PMID: 33263142.
- 475 45. Bil JS, Buława B, Świerzawski J. Mental health and the city in the post-COVID-19 era.  
476 *Sustainability*. 2021;13(14):7533. doi: 10.3390/su13147533.
- 477 46. Richman L, Pearson J, Beasley C, Stanifer J. Addressing health inequalities in diverse,  
478 rural communities: An unmet need. *SSM Popul Health*. 2019;7:100398. doi:  
479 10.1016/j.ssmph.2019.100398 PMID: 31011618.
- 480 47. Nepomuceno BB, Cardoso AA, Ximenes VM, Barros JPP, Leite JF. Mental health, well-  
481 being, and poverty: A study in urban and rural communities in Northeastern Brazil. *J Prev*  
482 *Interv Community*. 2016;44(1):63–75. doi: 10.1080/10852352.2016.1102590 PMID:  
483 26697905.
- 484 48. Wang Z, Li X, Chen M. Catastrophic health expenditures and its inequality in elderly

485 households with chronic disease patients in China. *Int J Equity Health*. 2015;14:8. doi:  
486 10.1186/s12939-015-0134-6 PMID: 25599715.

487 49. Hong J. Socio-economic inequalities in mental health and their determinants in South  
488 Korea. PhD Thesis, The London School of Economics and Political Science. 2012.  
489 Available from: <http://etheses.lse.ac.uk/id/eprint/494>
